# Supplementary material for: Semaglutide as a Possible Calmodulin Binder: Ligand-Based Computational Analyses and Relevance to Its Associated Reward and Appetitive Behaviour Actions
Source: MDPI journal article supplement (doi:10.3390/scipharm92020017), 2024-03-22
Supplement: s1 [file s1]

**Table S1.** Identified proteins by PepBDB research.

| PDB ID | Peptide<br>Seq iden-<br>tity % | Type of protein when human              |
|--------|--------------------------------|-----------------------------------------|
| 1APM   | 50                             | No human                                |
| 1AVG   | 35.7                           | No human                                |
| 1BB1   | 71.4                           | No human                                |
| 1CDK   | 50                             | No human                                |
| 1CTP   | 50                             | No human                                |
| 1DUM   | 45.5                           | No human                                |
| 1ETR   | 35.7                           | No human                                |
| 1JBP   | 50                             | No human                                |
| 1JGN   | 45.5                           | poly(A)-binding protein (PABC)          |
| 1Q62   | 50                             | No human                                |
| 1RDQ   | 50                             | No human                                |
| 1SMH   | 50                             | No human                                |
| 1STC   | 50                             | No human                                |
| 1SVH   | 50                             | No human                                |
| 1TBR   | 35.7                           | No human                                |
| 1TGG   | 50                             | No human                                |
| 1UCY   | 35.7                           | No human                                |
| 1VF5   | 62.5                           | No human                                |
| 1YDR   | 50                             | No human                                |
| 2E74   | 62.5                           | No human                                |
| 2EQ8   | 46.2                           | No human                                |
| 2GNG   | 50                             | No human                                |
| 2GNJ   | 50                             | No human                                |
| 2GU8   | 50                             | Inhibitors for AKT                      |
| 2JO4   | 35.7                           | No human                                |
| 2JO5   | 35.7                           | No human                                |
| 2KIX   | 50                             | No human                                |
| 2L9U   | 55.6                           | No human                                |
| 2LGF   | 71.4                           | Ca <sup>2+</sup> /calmodulin            |
| 2M04   | 50                             | BCL-xL in complex with PUMA BH3 peptide |
| 2ODY   | 35.7                           | No human                                |
| 2QUR   | 50                             | No human                                |
| 2RQH   | 45.5                           | No human                                |
| 2VOF   | 50                             | No human                                |
| 2YJ1   | 50                             | BCL-xL in complex with PUMA BH3 peptide |
| 3AMA   | 50                             | PKA                                     |
| 3B8E   | 50                             | sodium-potassium pump                   |
| 3C59   | 46.2                           | GLP1                                    |
| 3C5T   | 46.2                           | GLP1                                    |
| 3DNE   | 50                             | No human                                |
| 3FJQ   | 50                             | No human                                |
| 3IOL   | 92.3                           | GLP1                                    |
| 3KDP   | 50                             | sodium-potassium pump                   |
| 3L9M   | 50                             | PKAB3                                   |
| 3N23   | 50                             | sodium-potassium pump                   |
| 3NX8   | 50                             | cAMP dependent protein kinase           |

|      |      |                                                           |
|------|------|-----------------------------------------------------------|
| 3OOG | 50   | cAMP dependent protein kinase                             |
| 3POO | 50   | cAMP dependent protein kinase                             |
| 3QAL | 50   | cAMP dependent protein kinase                             |
| 3QAM | 50   | cAMP dependent protein kinase                             |
| 3R46 | 66.7 | No human                                                  |
| 3R47 | 66.7 | No human                                                  |
| 3R48 | 66.7 | No human                                                  |
| 3ZO4 | 50   | No human                                                  |
| 3ZY0 | 50   | No human                                                  |
| 4AXA | 50   | No human                                                  |
| 4C33 | 50   | No human                                                  |
| 4C38 | 50   | No human                                                  |
| 4CZ5 | 50   | No human                                                  |
| 4CZ6 | 41.7 | No human                                                  |
| 4CZ7 | 45.5 | No human                                                  |
| 4D1L | 45.5 | No human                                                  |
| 4D1L | 45.5 | No human                                                  |
| 4D1L | 45.5 | No human                                                  |
| 4D1M | 50   | No human                                                  |
| 4D1M | 50   | No human                                                  |
| 4DFX | 50   | No human                                                  |
| 4DG3 | 50   | No human                                                  |
| 4DH7 | 50   | No human                                                  |
| 4H44 | 62.5 | No human                                                  |
| 4H7R | 50   | No human                                                  |
| 4H8M | 66.7 | No human                                                  |
| 4HNJ | 50   | PUMA BH3 peptide                                          |
| 4HPU | 50   | No human                                                  |
| 4KVT | 66.7 | No human                                                  |
| 4OGQ | 62.5 | No human                                                  |
| 4OXM | 50   | No human                                                  |
| 4PNA | 50   | No human                                                  |
| 4PNB | 41.7 | No human                                                  |
| 4Q5U | 42.9 | calmodulin bound to its recognition site from calcineurin |
| 4QOY | 38.5 | No human                                                  |
| 4R8T | 62.5 | No human                                                  |
| 4RS9 | 35.7 | No human                                                  |
| 4S1X | 50   | No human                                                  |
| 4WB6 | 50   | cAMP-dependent protein kinase A                           |
| 4WB7 | 50   | cAMP-dependent protein kinase A                           |
| 4WB8 | 50   | cAMP-dependent protein kinase A                           |
| 4XW6 | 50   | No human                                                  |
| 4YJ4 | 50   | Bcl-xL No human                                           |
| 4YK9 | 50   | Bcl-xL No human                                           |
| 4YWC | 35.7 | No human                                                  |
| 4Z84 | 50   | No human                                                  |
| 4ZGM | 100  | GLP1                                                      |
| 5CGO | 45.5 | No human                                                  |
| 5EOJ | 83.3 | No human                                                  |
| 5EON | 77.8 | No human                                                  |
| 5EZ8 | 66.7 | No human                                                  |
| 5EZ9 | 50   | No human                                                  |

|      |      |                                     |
|------|------|-------------------------------------|
| 5LCQ | 50   | cAMP-dependent Protein Kinase (PKA) |
| 5M0B | 50   | cAMP-dependent Protein Kinase (PKA) |
| 5M6Y | 50   | cAMP-dependent Protein Kinase (PKA) |
| 5N23 | 50   | Protein kinase A mutants            |
| 5NNM | 45.5 | human cathelicidin                  |
| 5NNT | 45.5 | Antimicrobial peptides              |
| 5OK3 | 50   | No human                            |
| %OTT | 46.2 | Glp1                                |
| 5OTU | 92.3 | Glp1                                |
| 5OTV | 92.3 | Glp1                                |
| 5OTX | 92.3 | Glp1                                |
| 5OUC | 50   | Protein kinase A                    |
| 5UUK | 41.7 | PUMA                                |
| 5UUL | 50   | PUMA                                |
| 5UUM | 41.7 | PUMA                                |
| 5VAI | 93.3 | Glp1                                |
| 5VHB | 50   | Protein kinase A                    |
| 5XVW | 55.6 | No human                            |
| 6B3J | 46.2 | Glp1                                |
| 6EIK | 50   | No human                            |
| 6EIK | 50   | No human                            |
| 6EIZ | 41.7 | No human                            |
| 6EIZ | 41.7 | No human                            |
| 6EM7 | 50   | Protein kinase A                    |
| 6ERU | 50   | Protein kinase A                    |
| 6FBX | 45.5 | No human                            |
| 6G65 | 50   | No human                            |
| 6G66 | 41.7 | No human                            |
| 6G67 | 50   | No human                            |
| 6G6A | 41.7 | No human                            |
| 6G6E | 66.7 | No human                            |
| 6G6F | 50   | No human                            |
| 6G6G | 54.5 | No human                            |
| 6GB1 | 61.5 | GLP1                                |
| 6I2A | 50   | PKA                                 |
| 6I2B | 50   | PKA                                 |
| 6Q53 | 45.5 | No human                            |
| 6Q5H | 66.7 | No human                            |
| 6Q5I | 66.7 | No human                            |
| 6Q5J | 66.7 | No human                            |
| 6Q5K | 66.7 | No human                            |
| 6Q5L | 66.7 | No human                            |
| 6Q5M | 66.7 | No human                            |
| 6Q5N | 66.7 | No human                            |
| 6Q5P | 50   | No human                            |
| 6QFM | 50   | No human                            |
| 6QG8 | 50   | PUMA                                |

**Peptide options**

Copy and paste your **peptide** sequence below (Sample input):

HEGTFITSDVSSYLEG

**OR** upload your **peptide** sequence file:  Nessun...zionato

☒ Search the database at  sequence identity

☐ Retrieve only representatives at  sequence identity

☐ Search by peptide length: Between  and

☒ Include peptides with non-standard amino acids.

**Figure S1.** Input parameters used in PepBDB.
